# Supplementary material for: Magnetic Core-Shell Nanoparticles Using Molecularly Imprinted Polymers for Zearalenone Determination
Source: MDPI journal article supplement (doi:10.3390/molecules27238166), 2022-11-23
Supplement: s1 [file s1]

## **Supplementary Materials**

# **Magnetic Core-Shell Nanoparticles Using Molecularly Imprinted Polymers for Zearalenone Determination**

Luis Calahorra-Rio, Miriam Guadaño-Sánchez, Tamara Moya-Cavas and Javier Lucas Urraca \*

Department of Analytical Chemistry, Faculty of Chemistry, Complutense  
University of Madrid, Plaza Ciencias, 2, 28040 Madrid, Spain

\* Correspondence: [jurracar@ucm.es](mailto:jurracar@ucm.es)

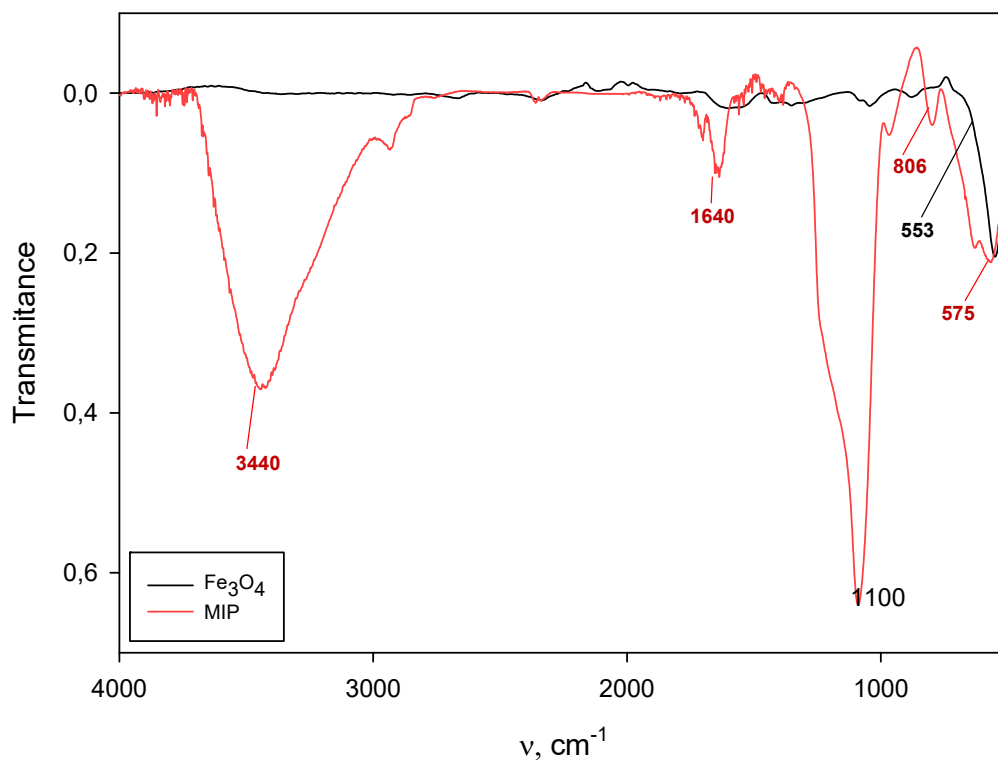

**Figure S1.** FT-IR spectra of  $\text{Fe}_3\text{O}_4$  magnetic cores before (black line) and after coating, MIP (red line).

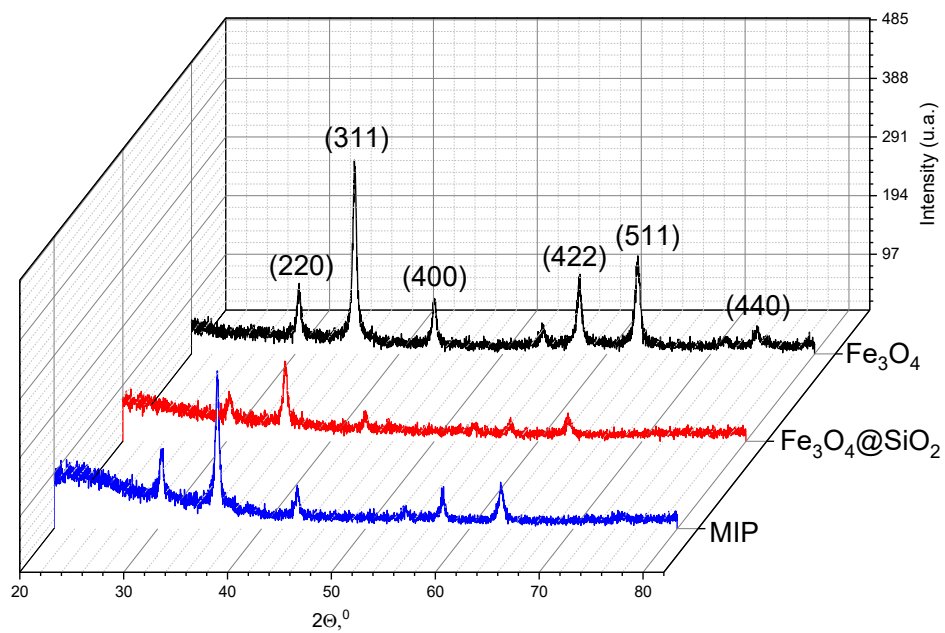

**Figure S2.** XRD pattern (black line) of magnetic cores before coating, (red line) of magnetic cores coated with  $\text{SiO}_2$  and (blue line) nanocomposite of  $\text{Fe}_3\text{O}_4$ @ $\text{SiO}_2$  coated with sol-gel MIP after template molecule extraction.

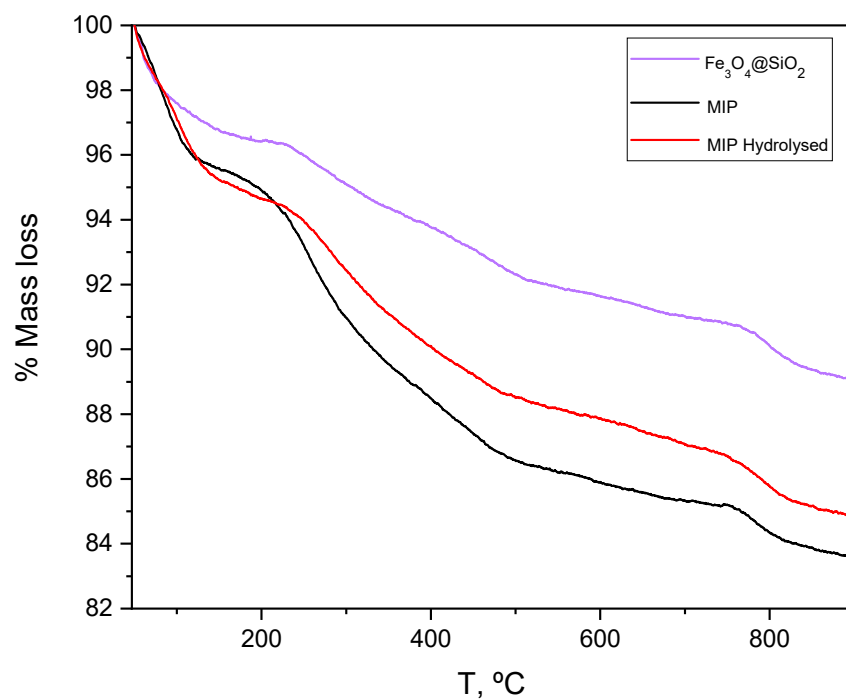

**Figure S3.** Thermogravimetric analysis (TGA) of Fe<sub>3</sub>O<sub>4</sub>@SiO<sub>2</sub> (purple line), MIP (black line) and MIP nanoparticles after hydrolysis of the template molecule (red line).

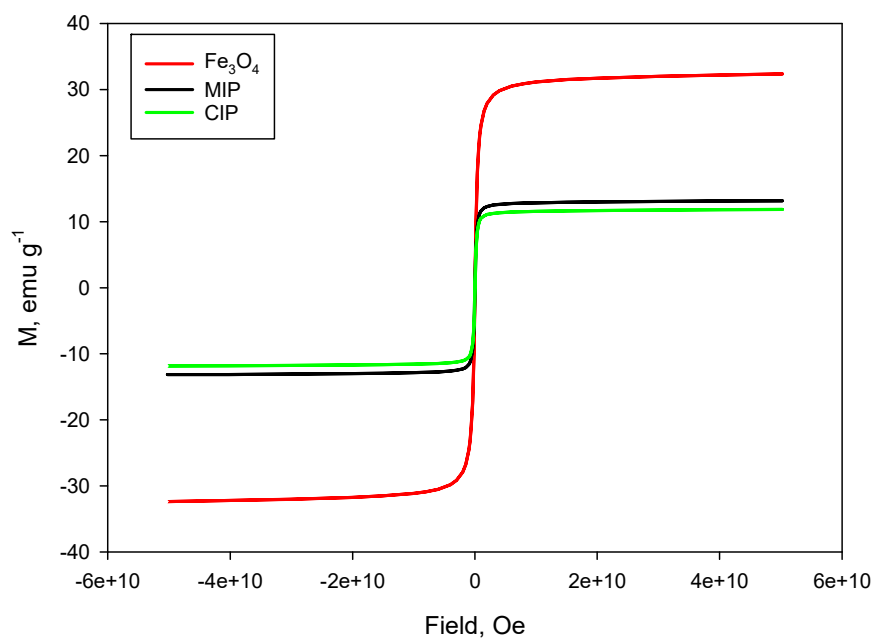

**Figure S4.** Magnetism study of Fe<sub>3</sub>O<sub>4</sub> magnetic nanoparticles (red line), MIP (black line) and CIP (green line).

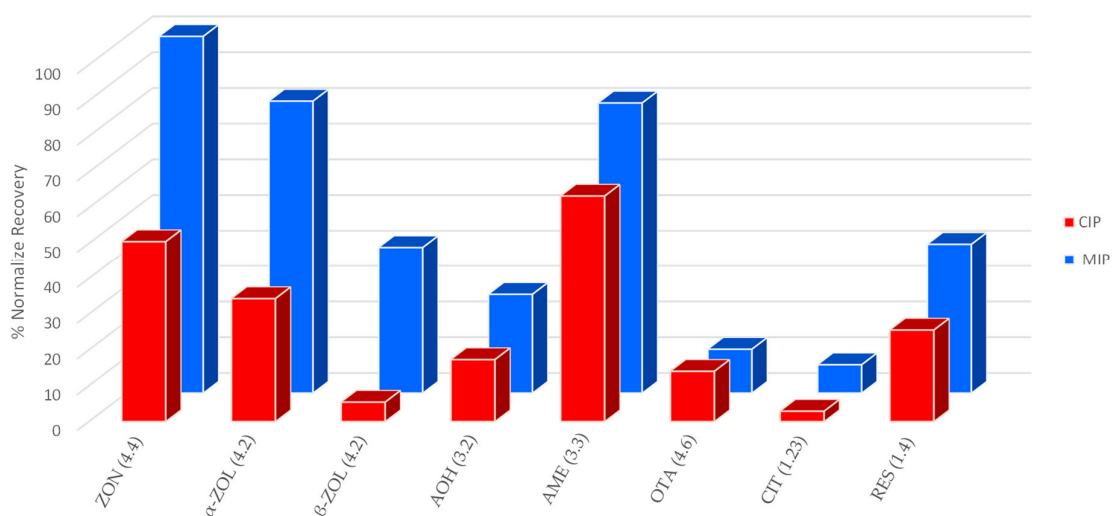

**Figure S5.** Recovery (%) of ZON,  $\alpha$ -ZOL,  $\beta$ -ZOL, AOH, AME, OTA, CIT, RES and TeA ( $V = 1$  mL in phosphate buffer 50 mM,  $pH = 7.5$ ) spiked at  $150 \mu\text{g L}^{-1}$  with each of the tested compounds ( $RSD \leq 22\%$ ,  $n = 3$ ) and their corresponding  $\log P$  values.

**Table S1.** Microanalysis of the MNPs before and after the coatings, MIPs and CIPs after the hydrolysis process for the extraction of the respective template molecule.

| Sample                                        | % C ( $\pm 0.35$ ) | % H ( $< LC$ ) | % N ( $\pm 0.30$ ) |
|-----------------------------------------------|--------------------|----------------|--------------------|
| $\text{Fe}_3\text{O}_4$                       | 2,99               | 0,73           | 0,13               |
| $\text{Fe}_3\text{O}_4@SiO_2$                 | 2,59               | 1,54           | 0,17               |
| $\text{Fe}_3\text{O}_4@SiO_2@MISG$            | 12,76              | 1,93           | 0,93               |
| $\text{Fe}_3\text{O}_4@SiO_2@MISG$ hydrolysis | 3,48               | 1,47           | 0,63               |
| $\text{Fe}_3\text{O}_4@SiO_2@CISG$            | 14,39              | 2,59           | 0,79               |
| $\text{Fe}_3\text{O}_4@SiO_2@CISG$ hydrolysis | 4,57               | 1,65           | 0,55               |
